# Supplementary material
Source: HighWire-hosted journal article supplement (https://www.mcponline.org/content/suppl/2018/02/01/RA117.000290)
Supplement: 4914_1_supp_54366_p2hd9f.pdf [file 4914_1_supp_54366_p2hd9f.pdf]

### A (Normal)

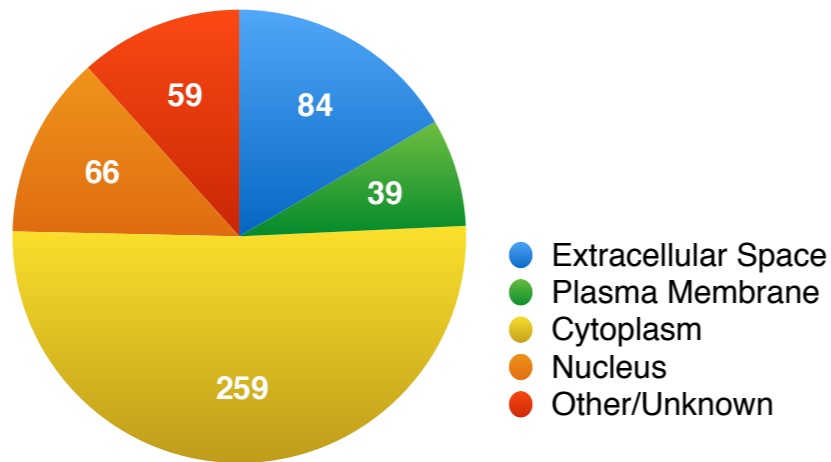

### B (OAB)

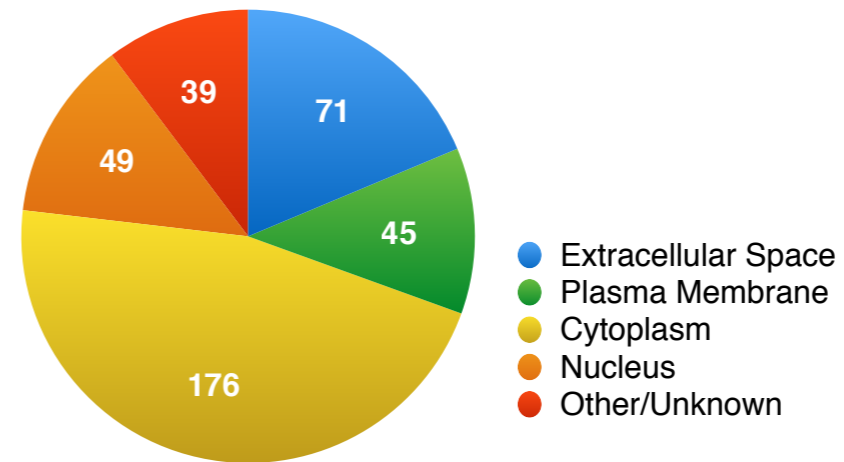

**Figure S1. Classification of subcellular localizations of the identified proteins.** The identified proteins were examined with respect to cellular localization. **(A)** Proteins identified in the normal rat urothelium. **(B)** Proteins identified in the OAB rat urothelium. The numbers refer to the number of proteins.
